1 **Public perceptions and preventive behaviours during the early phase of the COVID-19**  
2 **pandemic: a comparative study between Hong Kong and the United Kingdom**

3  
4 Bowman LR\*<sup>1</sup>, Kwok KO <sup>\*,#3,4,5</sup>, Redd RE<sup>2</sup>, Yi YY<sup>3</sup>, Ward H<sup>1,2</sup>, Wei W<sup>3</sup>, Atchison C<sup>^#2</sup>, Wong  
5 SYS<sup>^3</sup>

6 \* Authors contributed equally

7 ^ Authors contributed equally

8 Joint correspondence: [kkokwok@cuhk.edu.hk](mailto:kkokwok@cuhk.edu.hk); [christina.atchison11@imperial.ac.uk](mailto:christina.atchison11@imperial.ac.uk)

9  
10 <sup>1</sup> MRC Centre for Global Infectious Disease Analysis and Abdul Latif Jameel Institute for Disease  
11 and Emergency Analytics (J-IDEA), School of Public Health, Imperial College London, United  
12 Kingdom

13 <sup>2</sup> Patient Experience Research Centre, School of Public Health, Imperial College London, United  
14 Kingdom

15 <sup>3</sup> JC School of Public Health and Primary Care, The Chinese University of Hong Kong, Hong  
16 Kong Special Administrative Region, China.

17 <sup>4</sup> Stanley Ho Centre for Emerging Infectious Diseases, The Chinese University of Hong Kong,  
18 Hong Kong Special Administrative Region, China

19 <sup>5</sup> Shenzhen Research Institute of The Chinese University of Hong Kong, Shenzhen, China

20 **ABSTRACT**

21

22 **Background:** In the absence of treatments and vaccines, the mitigation of COVID-19 relies on  
23 population engagement in non-pharmaceutical interventions, which is driven by their risk  
24 perception, anxiety level and knowledge. There may also be regional discrepancies in these drivers  
25 due to different historical exposure to disease outbreaks, government responses and cultures. As  
26 such, this study compared psycho-behavioral responses in two regions during the early phase of  
27 the pandemic.

28

29 **Methods:** Comparable cross-sectional surveys were administered among adults in Hong Kong  
30 (HK) and the United Kingdom (UK) during the early phase of each respective epidemic.  
31 Explanatory variables included demographics, risk perception and knowledge of COVID-19,  
32 anxiety level and preventive behaviors. Responses were weighted according to census data.  
33 Logistic regression models, including interaction terms to quantify regional differences, were used  
34 to assess the association between explanatory variables and the adoption of social-distancing  
35 measures.

36

37 **Results:** Data of 3431 complete responses (HK:1663; UK:1768) were analysed. Perceived severity  
38 differed by region (HK: 97.5%; UK: 20.7%). A large proportion of respondents were  
39 abnormally/borderline anxious (HK:64.8%; UK:45.9%) and regarded direct contact with infected  
40 individuals as the transmission route of COVID-19 (HK:94.0-98.5%; UK:69.2-93.5%), with HK  
41 identifying additional routes. HK reported high levels of adoption of social-distancing (HK:32.4-  
42 93.7%; UK:17.6-59.0%) and mask-wearing (HK:98.8%; UK:3.1%). The impact of perceived

43 severity and perceived ease of transmission on the adoption of social-distancing varied by region.  
44 In HK, they had no impact, whereas in the UK, those who perceived severity as “high” were more  
45 likely to adopt social-distancing (aOR:1.58-3.01), and those who perceived transmission as “easy”  
46 were prone to both general social-distancing (aOR:2.00, 95% CI:1.57, 2.55) and contact avoidance  
47 (aOR:1.80, 95% CI: 1.41, 2.30). The impact of anxiety on adopting social-distancing did not vary  
48 by region.

49  
50 **Discussion:** These results suggest that health officials should ascertain and consider baseline levels  
51 of risk perception and knowledge in the populations, as well as prior sensitisation to infectious  
52 disease outbreaks, during the development of mitigation strategies. Risk communication should be  
53 done through suitable media channels - and trust should be maintained - while early intervention  
54 remains the cornerstone of effective outbreak response.

55

56 **Word count:** 343

57

58 **KEYWORDS**

59 COVID-19; novel coronavirus; pandemic; behavioural response; risk perceptions; anxiety;

60 comparative; Hong Kong; United Kingdom

## 61 INTRODUCTION

62

63 In December 2019, a novel coronavirus (SARS-CoV-2) emerged in Wuhan, Hubei province,  
64 China, and spread rapidly throughout countries worldwide, forming the second pandemic of the  
65 21<sup>st</sup> century [1]. The disease progression varies by regions. As of 2 August 2020, there have been  
66 at least 17 million cases and over 670,000 deaths worldwide [2].

67

68 Prior to the availability of effective treatments and vaccines, strategies to mitigate the impact of the  
69 pandemic have been primarily non-pharmaceutical [3], mainly focused on public health promotion  
70 of the use of simple but effective preventive measures [4, 5]. Many important control strategies  
71 currently promoted by governments need public participation, either through direct adoption of  
72 preventative behaviours, such as handwashing or wearing face masks, or through compliance with  
73 social distancing policies, such as recommendations to avoid public transport and mass gatherings.

74

75 Previous studies of severe acute respiratory syndrome (SARS) and pandemic influenza have  
76 shown that governments should account for risk perception and anxiety when promoting  
77 preventative measures. There is evidence that higher perceived risk of infection is associated with  
78 increased adoption of precautionary measures against infection [6, 7], while increased anxiety has  
79 also been shown to increase the likelihood that people will engage in protective behaviour [8].

80 Moreover, longitudinal data suggest that such perceptions, behaviours and anxieties change with  
81 context, and over time, as uncertainty about disease severity reduces, and knowledge of  
82 transmission increases [9].

83

84 During the current coronavirus disease 2019 (COVID-19) pandemic, several studies have  
85 examined public risk perceptions and knowledge in various countries, including Finland [10],  
86 Israel [11], Italy [12], Nigeria [13], the United States [14] and Vietnam [15], but only few have  
87 identified the factors associated with greater adoption of preventative measures, or how these  
88 associations vary by context. In HK, both greater understanding of COVID-19 and increased  
89 anxiety were associated with greater adoption of social distancing behaviours [5]; whereas in the  
90 UK, there was a significant socio-economic gradient in the ability to adopt and comply with social  
91 distancing measures, specifically the ability to work from home and ability to self-isolate [16].

92  
93 This initial evidence - that there is variation across context in affective responses, risk perceptions,  
94 the impact of socio-demographic factors, and their association with uptake of preventative  
95 behaviours - has significant implications when tailoring policy to specific circumstances. In order  
96 to tease out these relationships, a more thorough, comparative analysis is required. Yet studies in  
97 different countries often use slightly different metrics to measure the same behaviour, which can  
98 lead to difficulty when interpreting the significance of heterogeneous contexts.

99  
100 In this study, we examined and compared public perception and adoption of preventive behaviours  
101 in response to the early phase of the COVID-19 pandemic in two different regions: HK and the  
102 UK. We further investigated the factors associated with greater adoption of different types of  
103 social distancing measures. Our results have immediate implications on how health officials plan  
104 and communicate the mitigation strategies for the ongoing COVID-19 pandemic to communities.

105

106 **MATERIALS AND METHODS**

107

108 *Study design and recruitment*

109

110 In HK and the UK, cross-sectional surveys were conducted during the early phase of the COVID-  
111 19 pandemic, when there were only limited government-level interventions in place [5, 16]. The  
112 survey period in HK was from 24 January 2020 to 13 February 2020, and in the UK from 17 to 18  
113 March 2020. In HK, the first laboratory-confirmed case was reported on 23 January 2020, rising to  
114 53 cases by 13 February 2020 [17]; whereas in the UK, the first two laboratory-confirmed cases  
115 were reported on 30 January 2020, rising to 3,902 cases by 17 March 2020 [18]. In HK, an online  
116 survey was distributed by district councils to their residents. Those individuals aged 18 years or  
117 above, who understood Chinese and lived in HK were eligible to participate [5]. In the UK, the  
118 online survey was distributed by a market research company to a random sample of an existing  
119 panel of 800,000+ adults (aged  $\geq 18$  years) [16]. Details of the survey design and sampling  
120 strategy are described elsewhere [5, 16].

121

122 *Study instrument*

123

124 The questionnaire used was largely similar across the two regions. Sociodemographic variables  
125 included age, sex, educational attainment and employment status. Anxiety level was measured  
126 using the Hospital, Anxiety and Depression scale - Anxiety (HASD-A) (0-7 = Normal; 8-10 =  
127 Borderline abnormal; 11-21 = Abnormal) [19]. Risk perception towards COVID-19 was measured  
128 by perceived severity of symptoms if infected with COVID-19. Knowledge of COVID-19 was  
129 assessed by asking whether COVID-19 could be transmitted through various routes, including

130 direct human exposure (for example, physical contact or a face-to-face conversation with someone  
131 who has coronavirus with or without symptoms) and other types of exposure (for example, visiting  
132 wet markets, or consumption of wild animal meat). Respondents were also asked about the sources  
133 from which they retrieved information about COVID-19. In addition, they were asked about  
134 adoption of preventative behaviours to cope with the transmission of COVID-19. Three types of  
135 preventative measures were considered: personal hygiene, social distancing and travel avoidance.

136

### 137 *Data analysis*

138

139 Descriptive statistics for all variables present the number of respondents and the raw or weighted  
140 percentages. The responding samples were weighted to be representative of the UK (UK 2011  
141 census data [20]) and HK adult population (HK 2016 census data [21]). Chi-square goodness-of-fit  
142 tests were used for comparison of characteristics across regions. Multivariate logistic regression  
143 models were used to identify sociodemographic and psychosocial factors associated with the  
144 adoption of three types of social distancing: (i) general measures, specified by avoiding crowded  
145 places, social events and going out; (ii) contact measures, specified by avoiding contact with  
146 individuals who had fever or respiratory symptoms, and who had been to affected areas recently;  
147 and (iii) work measure, specified by avoiding going to work.

148

149 Common and comparable sociodemographic factors considered in separate analytical studies [5,  
150 16] were included in this comparative analysis. The association between psychosocial factors  
151 (including level of anxiety, perceived severity and perceived ease of transmission) and adoption of  
152 social-distancing measures was considered a priori to be affected by region. Therefore, we

153 examined the effect modification due to region using interaction terms in the baseline models,  
154 which can be interpreted as the difference of the estimated effects of psychosocial factors on  
155 adopting social-distancing measures due to different regions. Adjusted odds ratios (aOR) and 95%  
156 confidence intervals (CI) were estimated. Associations with a p-value <0.05 in the adjusted  
157 analyses were considered to be statistically significant. Analyses were conducted in R (v3.6.3).

158

### 159 *Ethical Approval*

160

161 The study was approved by Imperial College London Research Ethics Committee (reference  
162 number: 20IC5861) and Survey and Behavioral Research Ethics Committee of The Chinese  
163 University of Hong Kong (reference number: SBRE-19-625).

164

## 165 **RESULTS**

166

### 167 *Demographic differences*

168

169 There were significant differences in the sociodemographic characteristics of study respondents  
170 between the two regions. HK respondents were younger, with 26.0% aged 18-24 years, compared  
171 with 9.4% for the UK ( $P<0.001$ ) (**Table 1**). The HK sample contained a greater proportion of  
172 females (68.6% [HK] vs. 52.9% [UK];  $P<0.01$ ), and those educated to university degree level or  
173 above (63.2% [HK] vs. 33.7% [UK];  $P<0.001$ ). Employment status reflected the age structure of  
174 respondents in each setting, with a greater proportion of the UK respondents in the retired category  
175 (2.6% [HK] vs. 27.2% [UK];  $P<0.001$ ) (**Table 1**).



176

177 *Perceptions and beliefs*

178

179 Higher perceived severity of COVID-19 was observed among HK respondents, with 97.5% rating  
180 the symptoms of COVID-19 infection as serious or very serious compared with only 20.7% of the  
181 UK respondents. In terms of levels of concern, 94.7% of the HK sample responded as feeling  
182 either very worried or fairly worried, compared with 78.8% of the UK sample. The HADS-A  
183 scores reflected similar trends, with 64.8% of the HK sample recording an abnormal or borderline  
184 abnormal result, compared with 45.9% of the UK sample (**Table 1**).

185

186 *Knowledge and information sources*

187

188 The majority of respondents regarded direct contact with infected individuals or virus-  
189 contaminated environments as the primary means of virus transmission (HK: 94.0-98.5%; UK:  
190 69.2-93.5%) (**Table 2**). However, respondents from HK identified a far boarder scope of  
191 transmission routes. A large proportion of HK respondents (66.5-93.3%) regarded wild animal  
192 meat, wet markets and imported goods as potential exposures, compared to 11.3-21.5% in the UK.  
193 There was also significant variation across use and reliability of information sources (**Table S1**)/  
194 The majority of respondents deemed health professionals reliable (HK, UK: >80%) but few could  
195 access them (HK:4.7%; UK:11.5%). In addition, most of the UK respondents (90.7%) considered  
196 official websites reliable, compared to 15.5% among HK respondents at the beginning of the  
197 pandemic.

198

199 *Adoption of social distancing measures*

200

201 There were variations in the weighted proportion of HK and the UK respondents adopting  
202 precautionary measures against COVID-19 (**Figure 1**). HK respondents reported higher levels of  
203 adoption across all social distancing and personal hygiene measures. In particular, 98.8% of HK  
204 respondents reported wearing a face mask compared to 3.1% among the UK respondents. General  
205 measures were adopted by 68.1-87.3 % and 37.8-59.0 % of respondents in HK and the UK,  
206 respectively. Contact measures were adopted by 83.9-93.7% and 33.7-50.1 % of respondents in  
207 HK and the UK, respectively. Work measure was reported by 32.4% and 22.5% of respondents in  
208 HK and the UK, respectively.

209

210 Sociodemographic factors were associated with the three social distancing measures (**Table S2**;  
211 **Table 3**). The UK respondents were significantly less likely than their HK counterparts to adopt  
212 social distancing measures (**Table S2**, aOR: 0.08-0.53,  $P < 0.001$ ; **Table 3**, aOR:0.08-0.70,  
213  $P < 0.001$ ). When adjusting for regional differences, general measures were less likely to be adopted  
214 by males (aOR:0.82; 95% CI:0.71-0.95) but more likely to be adopted by the unemployed  
215 (aOR:1.65; 95% CI: 1.30-2.09) or retired (aOR:1.92; 95% CI: 1.43-2.59). Contact measures were  
216 less likely to be adopted by males (aOR:0.74; 95% CI:0.63-0.88) but more likely to be adopted by  
217 those retired (aOR:1.40; 95% CI: 1.03-1.91). Finally, work measure was less likely to be adopted  
218 by those aged 55 years or above (aOR:0.60; 95% CI: 0.39-0.93).

219

220 The impact of perceived severity of infection and perceived ease of transmission on the adoption  
221 of social distancing behaviours vary by region (**Table 4**). In HK, they had no impact, whereas in  
222 the UK, those who perceived COVID-19 infection as serious were more likely to adopt all social

223 distancing measures (aOR:1.58-3.01), and those who perceived transmission of SARS-CoV-2 as  
224 easy were more prone to adopt both general social distancing measures (Model 4.2, aOR:2.00,  
225 95% CI:1.57-2.55) and contact measures (Model 5.2, aOR:1.80, 95% CI:1.41-2.30). On the other  
226 hand, the impact of anxiety on the adoption of social distancing behaviours did not significantly  
227 differ by region (**Table 4**). Those with borderline abnormal (HK, aOR:1.26-1.62; UK, aOR:1.36-  
228 1.48) or abnormal HADS-A (HK, aOR:1.82-2.09; UK, aOR:1.40-2.40) scores were more likely to  
229 adopt all three types of social distancing measures compared to those with normal anxiety levels.

230

## 231 **DISCUSSION**

232

### 233 *Principal results*

234

235 This study compared the initial public perceptions and preventative behaviours during the COVID-  
236 19 pandemic across HK and the UK. The adoption rate of social-distancing measures was higher in  
237 HK than in the UK. Risk perception and knowledge of COVID-19 were consistently and  
238 significantly higher in HK, but the UK respondents were more likely to alter behaviours to align  
239 with these two metrics: where transmission was considered ‘easy’, and perceived severity was  
240 considered ‘severe’, they were more likely to adopt preventive behaviours. Anxiety was a  
241 consistent driver of behaviour change irrespective of context: those more anxious were more likely  
242 to adopt preventative actions. Such behaviour is consistent with the wider literature surrounding  
243 the adoption of precautionary measures [6, 7], and in particular, provides further evidence that  
244 anxiety drives protective behaviours, such as handwashing [8], an effective intervention against the  
245 transmission of respiratory diseases [22].

246

247 *Implications*

248

249 This study has three implications. First, health officials should account for region-specific baseline  
250 levels of risk perception and knowledge when designing and promoting mitigation strategies. The  
251 evidence presented by this study demonstrates that regional context is important in terms of both  
252 how people understand risk, and how risk drives behaviour. While the significant social, historical  
253 and cultural heterogeneity between HK and the UK likely contributes to the results observed in this  
254 study, the importance of additional intrinsic factors, such as population sensitisation via past  
255 infectious disease outbreaks, and state-led health promotion campaigns, should not be  
256 underestimated. In studies elsewhere, public perceptions of these factors have been significant  
257 drivers of adoption of preventative behaviours during previous epidemics [23], while conceptions  
258 of personal risk have been connected to individuals' understanding of local disease prevalence and  
259 severity [24-26]. Therefore, assessment of the baseline population knowledge, attitudes and  
260 practices (KAP) and subsequent continual monitoring throughout the pandemic are essential to any  
261 effective context-specific pandemic preparedness plan.

262

263 Second, risk communication should build upon baseline KAP outcomes and develop trust across  
264 suitable media channels. Significant contextual heterogeneity in the public reliance on information  
265 sources provides additional insight here. HK reported greater reliance on social media and far less  
266 trust in official websites, suggesting that official messaging in HK unlikely drove individual  
267 behaviour change; by contrast, the UK results suggested that although the UK government held an  
268 effective platform to influence public health behaviour, government health messaging was

269 insufficient to attain similar HK baseline knowledge levels, particularly in the absence of prior  
270 population sensitisation to infectious disease outbreaks. Therefore, there is a pressing need to tailor  
271 communication approaches, likely on a graduated scale, but as a minimum in a binary fashion to  
272 accommodate both “naive” and “experienced” populations.

273  
274 Third, the comparative snapshots of initial community responses captured by this study  
275 demonstrate the diversity in approach and pandemic response during the early phases. Across  
276 many contexts, national lockdowns became commonplace as the true magnitude of transmission  
277 became apparent; but the associated indirect costs render blanket strategies untenable in the  
278 medium term. As national lockdowns are lifted, countries worldwide face the challenge of  
279 resurging cases, and must consider nuanced approaches to prevent additional harm. Driven by  
280 anxiety, high perceived severity and knowledge, HK conducted widespread preventative measures  
281 early, and en masse. Together with early government actions [27], the strategies adopted by the  
282 HK community were successful during the initial phase of the pandemic. Considering this, and that  
283 national populations are now highly sensitised to COVID-19 transmission, tailored public health  
284 messaging, early regional containment, and increased health capacity should ensure more effective  
285 public health responses with less indirect impact on national economies.

286

### 287 *Study strengths and limitations*

288

289 This study is one of few that compared community responses during a pandemic using similar  
290 metrics while adjusting for disease progression. It has two limitations though. First, both samples  
291 varied significantly across the demographic spectrum, and while responses were weighted, such

292 convenience sampling is unlikely to be representative of the wider populations. Second, the survey  
293 period in HK was three weeks, compared to two days in the UK. Therefore, while the timing of the  
294 two surveys relative to each national epidemic was comparable, there may be temporal differences  
295 between survey duration, which might lead to some sampling bias, especially during the initial  
296 phase of the pandemic when there is much uncertainty about the disease.

297

### 298 *Conclusions*

299

300 To conclude, this study compared the initial community responses towards COVID-19 in HK and  
301 the UK. In line with the high baseline level of risk perception and knowledge, and historical  
302 exposure to respiratory disease outbreaks, the adoption of preventive measures was higher in HK.  
303 However, the UK sample demonstrated that the adoption rate of preventive behaviours could be  
304 improved by heightened risk perception and knowledge, best driven by improved public health  
305 campaigns. Together, these results suggest that health officials should ascertain and consider  
306 baseline levels of risk perception and knowledge, as well as prior sensitisation to infectious disease  
307 outbreaks, during the development of mitigation strategies. Risk communication should be done  
308 through suitable media channels - and trust should be maintained - while early intervention  
309 remains the cornerstone of effective outbreak response.

310

311 Word count = 2618

312 **CONTRIBUTION**

313 Bowman LR (BLR), Kwok KO (KKO), Ward H (WH), Atchison C (AC) and Wong SYS (WSYS)  
314 conceived the study; KKO, Wei WI (WWI) and AC collected the data; KKO, Yi YY (YYY) and  
315 WWI analysed the data; BLR, KKO, Redd RE (RRE), WH, WWI, AC and WSYS interpreted the  
316 data; BLR wrote the first draft of the manuscript; KKO, RRE, YYY, WH, WWI, AC, and WSYS  
317 edited the manuscript.

318

319 **ACKNOWLEDGEMENTS**

320 The study was supported by Imperial NIHR Research Capability Funding and the internal funding  
321 of The Chinese University of Hong Kong.

322

323 **CONFLICTS OF INTEREST**

324 The authors declare that they have no known competing financial interests or personal  
325 relationships that could have appeared to influence the work reported in this paper.

326

327 **ABBREVIATIONS**

328 HK: Hong Kong

329 UK: United Kingdom

330 COVID-19: coronavirus disease 2019

331 SARS: severe acute respiratory syndrome

332 HASD-A : Hospital, Anxiety and Depression scale - Anxiety

333 aOR: adjusted odds ratio

334 CI: confidence interval

335 KAP: knowledge, attitudes and practices



336 **REFERENCES**

- 337 1. World Health Organization. Rolling updates on coronavirus disease (COVID-19) (Updated 31  
338 July 2020) 2020 [Available from: [https://www.who.int/emergencies/diseases/novel-](https://www.who.int/emergencies/diseases/novel-coronavirus-2019/events-as-they-happen)  
339 [coronavirus-2019/events-as-they-happen](https://www.who.int/emergencies/diseases/novel-coronavirus-2019/events-as-they-happen)].
- 340 2. Hong Kong Centre for Health Protection. Countries/areas with reported cases of Coronavirus  
341 Disease-2019 (COVID-19) (Last updated on August 2, 2020, 11 am) 2020 [Available from:  
342 [https://www.chp.gov.hk/files/pdf/statistics\\_of\\_the\\_cases\\_novel\\_coronavirus\\_infection\\_en.pdf](https://www.chp.gov.hk/files/pdf/statistics_of_the_cases_novel_coronavirus_infection_en.pdf)  
343 .
- 344 3. Kwok KO, Lai FYL, Wei VWI, Tsoi MTF, Wong SYS, Tang JWT. Comparing the impact of  
345 various interventions to control the spread of COVID-19 in twelve countries. *J Hosp Infect*.  
346 2020. PMID: 32619456
- 347 4. Prime Minister's Office of The governemnt of the United Kingdom. Prime Minister's  
348 statement on coronavirus (COVID-19): 16 March 2020 2020 [Available from:  
349 <https://www.gov.uk/government/speeches/pm-statement-on-coronavirus-16-march-2020>].
- 350 5. Kwok KO, Li KK, Chan HHH, Yi YY, Tang A, Wei WI, et al. Community Responses during  
351 Early Phase of COVID-19 Epidemic, Hong Kong. *Emerg Infect Dis*. 2020;26(7):1575-9.  
352 PMID: 32298227
- 353 6. Leung GM, Ho LM, Chan SK, Ho SY, Bacon-Shone J, Choy RY, et al. Longitudinal  
354 assessment of community psychobehavioral responses during and after the 2003 outbreak of  
355 severe acute respiratory syndrome in Hong Kong. *Clin Infect Dis*. 2005;40(12):1713-20.  
356 PMID: 15909256
- 357 7. Bish A, Michie S. Demographic and attitudinal determinants of protective behaviours during a  
358 pandemic: a review. *Br J Health Psychol*. 2010;15(Pt 4):797-824. PMID: 20109274

- 359 8. Jones JH, Salathe M. Early assessment of anxiety and behavioral response to novel swine-  
360 origin influenza A(H1N1). *PLoS One*. 2009;4(12):e8032. PMID: 19997505
- 361 9. Bults M, Beaujean DJ, de Zwart O, Kok G, van Empelen P, van Steenberg JE, et al.  
362 Perceived risk, anxiety, and behavioural responses of the general public during the early phase  
363 of the Influenza A (H1N1) pandemic in the Netherlands: results of three consecutive online  
364 surveys. *BMC Public Health*. 2011;11:2. PMID: 21199571
- 365 10. Lohiniva AL, Sane J, Sibenberg K, Puumalainen T, Salminen M. Understanding coronavirus  
366 disease (COVID-19) risk perceptions among the public to enhance risk communication  
367 efforts: a practical approach for outbreaks, Finland, February 2020. *Euro Surveill*.  
368 2020;25(13). PMID: 32265008
- 369 11. Gesser-Edelsburg A, Cohen R, Hijazi R, Abed Elhadi Shahbari N. Analysis of Public  
370 Perception of the Israeli Government's Early Emergency Instructions Regarding COVID-19:  
371 Online Survey Study. *J Med Internet Res*. 2020;22(5):e19370. PMID: 32392172
- 372 12. Motta Zanin G, Gentile E, Parisi A, Spasiano D. A Preliminary Evaluation of the Public Risk  
373 Perception Related to the COVID-19 Health Emergency in Italy. *Int J Environ Res Public*  
374 *Health*. 2020;17(9). PMID: 32349253
- 375 13. Olapegba PO, Ayandele O. Survey data of COVID-19-related Knowledge, Risk Perceptions  
376 and Precautionary Behavior among Nigerians. *Data Brief*. 2020:105685. PMID: 32391411
- 377 14. McFadden SM, Malik AA, Aguolu OG, Willebrand KS, Omer SB. Perceptions of the adult  
378 US population regarding the novel coronavirus outbreak. *PLoS One*. 2020;15(4):e0231808.  
379 PMID: 32302370
- 380 15. Huynh TLD. Data for understanding the risk perception of COVID-19 from Vietnamese  
381 sample. *Data Brief*. 2020;30:105530. PMID: 32322641

- 382 16. Atchison CJ, Bowman L, Vrinten C, Redd R, Pristera P, Eaton JW, et al. Perceptions and  
383 behavioural responses of the general public during the COVID-19 pandemic: A cross-  
384 sectional survey of UK Adults. 2020.
- 385 17. Hong Kong Centre for Health Protection. Latest situation of cases of COVID-19 (as of 2  
386 August 2020) 2020 [Available from:  
387 [https://www.chp.gov.hk/files/pdf/local\\_situation\\_covid19\\_en.pdf](https://www.chp.gov.hk/files/pdf/local_situation_covid19_en.pdf).
- 388 18. Department of Health and Social Care and Public Health England. Coronavirus cases in the  
389 UK: daily updated statistics 2020 [Available from: [https://www.gov.uk/guidance/coronavirus-](https://www.gov.uk/guidance/coronavirus-covid-19-information-for-the-public)  
390 [covid-19-information-for-the-public](https://www.gov.uk/guidance/coronavirus-covid-19-information-for-the-public).
- 391 19. Snaith RP. The Hospital Anxiety And Depression Scale. Health Qual Life Outcomes.  
392 2003;1:29. PMID: 12914662
- 393 20. Office for National Statistics. 2011 Census 2011 [Available from:  
394 <https://www.ons.gov.uk/census/2011census>.
- 395 21. The Census and Statistics Department. By-census Results 2016 [Available from:  
396 <https://www.bycensus2016.gov.hk/en/>.
- 397 22. Rabie T, Curtis V. Handwashing and risk of respiratory infections: a quantitative systematic  
398 review. Trop Med Int Health. 2006;11(3):258-67. PMID: 16553905
- 399 23. SteelFisher GK, Blendon RJ, Ward JR, Rapoport R, Kahn EB, Kohl KS. Public response to  
400 the 2009 influenza A H1N1 pandemic: a polling study in five countries. Lancet Infect Dis.  
401 2012;12(11):845-50. PMID: 23041199
- 402 24. Funk S, Salathe M, Jansen VA. Modelling the influence of human behaviour on the spread of  
403 infectious diseases: a review. J R Soc Interface. 2010;7(50):1247-56. PMID: 20504800

- 404 25. de Zwart O, Veldhuijzen IK, Elam G, Aro AR, Abraham T, Bishop GD, et al. Perceived  
405 threat, risk perception, and efficacy beliefs related to SARS and other (emerging) infectious  
406 diseases: results of an international survey. *Int J Behav Med.* 2009;16(1):30-40. PMID:  
407 19125335
- 408 26. Bults M, Beaujean DJ, Richardus JH, Voeten HA. Perceptions and behavioral responses of the  
409 general public during the 2009 influenza A (H1N1) pandemic: a systematic review. *Disaster  
410 Med Public Health Prep.* 2015;9(2):207-19. PMID: 25882127
- 411 27. Wong SYS, Kwok KO, Chan FKL. What can countries learn from Hong Kong's response to  
412 the COVID-19 pandemic? *CMAJ.* 2020;192(19):E511-E5. PMID: 32332040

## FIGURES AND TABLES

Table 1. Hong Kong and United Kingdom study respondent characteristics

| Characteristics                                   | UK (n = 1768) |      | HK (n = 1663) |      | P-value <sup>a</sup> |
|---------------------------------------------------|---------------|------|---------------|------|----------------------|
|                                                   | Number        | %    | Number        | %    |                      |
| <b>Age</b>                                        |               |      |               |      |                      |
| 18-24                                             | 166           | 9.4  | 433           | 26.0 | <0.001               |
| 25-34                                             | 243           | 13.7 | 535           | 32.2 |                      |
| 35-44                                             | 335           | 18.9 | 370           | 22.2 |                      |
| 45-54                                             | 300           | 17.0 | 193           | 11.6 |                      |
| 55+                                               | 724           | 41.0 | 132           | 7.9  |                      |
| <b>Sex</b>                                        |               |      |               |      |                      |
| Female                                            | 936           | 52.9 | 1141          | 68.6 | <0.001               |
| Male                                              | 832           | 47.1 | 522           | 31.4 |                      |
| <b>Education attainment</b>                       |               |      |               |      |                      |
| No formal qualification/ lower secondary or below | 100           | 5.7  | 53            | 3.2  | <0.001               |
| Secondary level qualification/ higher secondary   | 738           | 41.7 | 292           | 17.6 |                      |
| Post-secondary but below degree                   | 334           | 18.9 | 267           | 16.1 |                      |
| Degree or above                                   | 596           | 33.7 | 1051          | 63.2 |                      |
| <b>Employment status</b>                          |               |      |               |      |                      |
| Employer/Employee                                 | 1025          | 58.0 | 1135          | 68.3 | <0.001               |
| Full-time student                                 | 90            | 5.1  | 278           | 16.7 |                      |
| Unemployed/Not working                            | 172           | 9.7  | 206           | 12.4 |                      |
| Retired                                           | 481           | 27.2 | 44            | 2.6  |                      |
| <b>Perceived severity <sup>b</sup></b>            |               |      |               |      |                      |
| Level 1                                           | 96            | 5.4  | 1071          | 64.4 | <0.001               |
| Level 2                                           | 270           | 15.3 | 550           | 33.1 |                      |
| Level 3                                           | 1058          | 59.8 | 32            | 1.9  |                      |
| Level 4                                           | 320           | 18.1 | 7             | 0.4  |                      |
| Level 5                                           | 24            | 1.4  | 3             | 0.2  |                      |
| <b>Worry about COVID-19</b>                       |               |      |               |      |                      |
| Very worried                                      | 536           | 30.3 | 852           | 51.2 | <0.001               |
| Fairly worried                                    | 858           | 48.5 | 723           | 43.5 |                      |
| Neutral/ Don't know                               | 5             | 0.3  | 40            | 2.4  |                      |
| Not very worried                                  | 295           | 16.7 | 1             | 0.1  |                      |
| Not at all worried                                | 74            | 4.2  | 47            | 2.8  |                      |
| <b>Anxiety level</b>                              |               |      |               |      |                      |
| Normal                                            | 956           | 54.1 | 586           | 35.2 | <0.001               |
| Borderline abnormal                               | 336           | 19.0 | 512           | 30.8 |                      |
| Abnormal                                          | 476           | 26.9 | 565           | 34.0 |                      |

<sup>a</sup> Chi-square goodness-of-fit test

<sup>b</sup> Level 1 = very serious (HK) / life-threatening (UK); Level 2 = serious (HK) / severe (e.g. may need care and treatment in hospital) (UK); Level 3 = neutral (HK) / moderate (e.g. may need self-care and rest in bed) (UK); Level 4 = not serious (HK) / mild (e.g. can go about daily tasks normally) (UK); Level 5 = not serious at all (HK) / no symptoms (UK)

Table 2. Knowledge of COVID-19 transmission

| Are the following transmission routes of COVID-19?                                                             | Number of respondents answering "yes"<br>(weighted %) |             |
|----------------------------------------------------------------------------------------------------------------|-------------------------------------------------------|-------------|
|                                                                                                                | UK (n=1768)                                           | HK (n=1663) |
| <b>Contact</b>                                                                                                 |                                                       |             |
| Face-to-face conversation (no physical contact) with someone who has coronavirus but no symptoms               | 1234 (69.2)                                           | 1564 (94.0) |
| Face-to-face conversation (no physical contact) with someone who has coronavirus with symptoms                 | 1398 (78.7)                                           | 1616 (96.7) |
| Physical contact with someone who has coronavirus but no symptoms                                              | 1580 (89.0)                                           | 1635 (98.1) |
| Physical contact with someone with coronavirus who has symptoms                                                | 1657 (93.5)                                           | 1644 (98.5) |
| <b>Transmission mode</b>                                                                                       |                                                       |             |
| Droplets                                                                                                       | -                                                     | 1649 (99.2) |
| Aerosol when infected people cough or sneeze                                                                   | -                                                     | 1478 (91.3) |
| Being in close contact (i.e. within 2 meters) to someone who has coronavirus when they cough or sneeze         | 1604 (90.4)                                           | -           |
| Being further away (i.e. further than 2 meters away) to someone who has coronavirus, when they cough or sneeze | 615 (34.8)                                            | -           |
| <b>Others</b>                                                                                                  |                                                       |             |
| Contact with virus-contaminated environment                                                                    | 1411 (79.5)                                           | 1594 (96.2) |
| Consumption of wild animal meat                                                                                | 199 (11.3)                                            | 1546 (93.3) |
| Visiting wet market                                                                                            | 374 (21.5)                                            | 1342 (80.9) |
| Consumption of seafood imported from specific regions <sup>a</sup>                                             | 258 (14.8)                                            | 1199 (70.7) |
| Consumption/use of products imported from specific regions <sup>a</sup>                                        | 209 (12.1)                                            | 1101 (66.5) |

<sup>a</sup> Specific regions refer to Wuhan (HK)/ China (UK).

Table 3. Factors associated with the adoption of different types of social distancing

| Factors                                              | Types of social distancing                 |         |                                            |         |                                         |         |
|------------------------------------------------------|--------------------------------------------|---------|--------------------------------------------|---------|-----------------------------------------|---------|
|                                                      | General <sup>a</sup> (n=3431)<br>(Model 1) |         | Contact <sup>b</sup> (n=3431)<br>(Model 2) |         | Work <sup>c</sup> (n=2160)<br>(Model 3) |         |
|                                                      | aOR (95% CI)                               | P-value | aOR (95% CI)                               | P-value | aOR (95% CI)                            | P-value |
| <b>Age</b>                                           |                                            |         |                                            |         |                                         |         |
| 18-24                                                | -                                          | -       | -                                          | -       | -                                       | -       |
| 25-34                                                | 1.54 (1.16, 2.05)                          | 0.003   | 0.96 (0.68, 1.35)                          | 0.81    | 1.00 (0.72, 1.39)                       | 0.99    |
| 35-44                                                | 1.25 (0.93, 1.68)                          | 0.13    | 0.74 (0.53, 1.05)                          | 0.09    | 0.95 (0.68, 1.33)                       | 0.77    |
| 45-54                                                | 1.30 (0.95, 1.79)                          | 0.10    | 0.67 (0.47, 0.97)                          | 0.03    | 0.72 (0.49, 1.05)                       | 0.09    |
| 55+                                                  | 0.99 (0.70, 1.41)                          | 0.97    | 0.81 (0.55, 1.19)                          | 0.28    | 0.60 (0.39, 0.93)                       | 0.02    |
| <b>Sex</b>                                           |                                            |         |                                            |         |                                         |         |
| Female                                               | -                                          | -       | -                                          | -       | -                                       | -       |
| Male                                                 | 0.82 (0.71, 0.95)                          | 0.01    | 0.74 (0.63, 0.88)                          | <0.001  | 0.95 (0.78, 1.16)                       | 0.62    |
| <b>Education attainment <sup>d</sup></b>             |                                            |         |                                            |         |                                         |         |
| No formal qualification/<br>lower secondary or below | -                                          | -       | -                                          | -       | -                                       | -       |
| Secondary level qualification/<br>higher secondary   | 0.99 (0.68, 1.44)                          | 0.94    | 0.96 (0.64, 1.44)                          | 0.85    | 1.04 (0.46, 2.34)                       | 0.92    |
| Post-secondary but below degree                      | 1.06 (0.72, 1.55)                          | 0.78    | 1.12 (0.74, 1.71)                          | 0.58    | 1.09 (0.48, 2.47)                       | 0.83    |
| Degree or above                                      | 1.27 (0.87, 1.83)                          | 0.21    | 0.98 (0.66, 1.47)                          | 0.94    | 1.94 (0.88, 4.28)                       | 0.10    |
| <b>Employment status</b>                             |                                            |         |                                            |         |                                         |         |
| Employed                                             | -                                          | -       | -                                          | -       | -                                       | -       |
| Full-time student                                    | 1.35 (0.98, 1.85)                          | 0.07    | 1.08 (0.73, 1.59)                          | 0.70    | -                                       | -       |
| Unemployed                                           | 1.65 (1.30, 2.09)                          | <0.001  | 1.20 (0.91, 1.58)                          | 0.20    | -                                       | -       |
| Retired                                              | 1.92 (1.43, 2.59)                          | <0.001  | 1.40 (1.03, 1.91)                          | 0.03    | -                                       | -       |
| <b>Region</b>                                        |                                            |         |                                            |         |                                         |         |
| HK                                                   | -                                          | -       | -                                          | -       | -                                       | -       |
| UK                                                   | 0.35 (0.30, 0.41)                          | <0.001  | 0.08 (0.07, 0.10)                          | <0.001  | 0.70 (0.57, 0.87)                       | <0.001  |

<sup>a</sup> "General" refers to avoiding going to: (i) crowded areas; (ii) social events; and (iii) going out.

<sup>b</sup> "Contact" refers to avoiding contacting individuals who (i) had a fever or respiratory symptoms; and (ii) had been to affected areas (UK) / Wuhan (HK) in the past 14 days (UK) / past month (HK).

<sup>c</sup> "Work" refers to avoiding going to work.

Table 4. Region-specific effect and the effect modification (by regions) of selected variables on the adoption of social distancing

| Region | Selected variables                                     | Types of social distancing      |         |                                 |         |                                 |         |
|--------|--------------------------------------------------------|---------------------------------|---------|---------------------------------|---------|---------------------------------|---------|
|        |                                                        | General <sup>a</sup> (n=3431)   |         | Contact <sup>b</sup> (n=3431)   |         | Work <sup>c</sup> (n=2160)      |         |
|        |                                                        | aOR (95% CI)                    | p-value | aOR (95% CI)                    | p-value | aOR (95% CI)                    | p-value |
|        | <b>Perceived severity <sup>d</sup></b>                 | <b>(Model 4.1) <sup>e</sup></b> |         | <b>(Model 5.1) <sup>e</sup></b> |         | <b>(Model 6.1) <sup>e</sup></b> |         |
| HK     | Not serious                                            | -                               | -       | -                               | -       | -                               | -       |
|        | Serious                                                | 0.93 (0.50, 1.74)               | 0.82    | 1.71 (0.85, 3.47)               | 0.13    | 0.63 (0.30, 1.30)               | 0.21    |
| UK     | Not serious                                            | -                               | -       | -                               | -       | -                               | -       |
|        | Serious                                                | 3.01 (2.35, 3.86)               | <0.001  | 1.90 (1.48, 2.43)               | <0.001  | 1.58 (1.06, 2.37)               | 0.03    |
|        | Effect modification <sup>f</sup>                       | 3.24 (1.65, 6.35)               | <0.001  | 1.11 (0.52, 2.34)               | 0.79    | 2.52 (1.09, 5.80)               | 0.03    |
|        | <b>Perceived ease of transmission <sup>g</sup></b>     | <b>(Model 4.2) <sup>e</sup></b> |         | <b>(Model 5.2) <sup>e</sup></b> |         | <b>(Model 6.2) <sup>e</sup></b> |         |
| HK     | Difficult                                              | -                               | -       | -                               | -       | -                               | -       |
|        | Easy                                                   | 1.15 (0.77, 1.74)               | 0.50    | 1.00 (0.58, 1.71)               | 0.99    | 0.61 (0.37, 1.03)               | 0.07    |
| UK     | Difficult                                              | -                               | -       | -                               | -       | -                               | -       |
|        | Easy                                                   | 2.00 (1.57, 2.55)               | <0.001  | 1.80 (1.41, 2.30)               | <0.001  | 1.34 (0.96, 1.87)               | 0.09    |
|        | Effect modification <sup>f</sup>                       | 1.73 (1.07, 2.79)               | 0.02    | 1.81 (1.00, 3.28)               | 0.05    | 2.18 (1.18, 4.04)               | 0.01    |
|        | <b>Anxiety level</b>                                   | <b>(Model 4.3) <sup>e</sup></b> |         | <b>(Model 5.3) <sup>e</sup></b> |         | <b>(Model 6.3) <sup>e</sup></b> |         |
| HK     | Normal                                                 | -                               | -       | -                               | -       | -                               | -       |
|        | Borderline abnormal                                    | 1.62 (1.27, 2.06)               | <0.001  | 1.26 (0.93, 1.70)               | 0.14    | 1.51 (1.10, 2.06)               | 0.01    |
|        | Abnormal                                               | 2.09 (1.64, 2.66)               | <0.001  | 1.85 (1.34, 2.56)               | <0.001  | 1.82 (1.34, 2.48)               | <0.001  |
| UK     | Normal                                                 | -                               | -       | -                               | -       | -                               | -       |
|        | Borderline abnormal                                    | 1.48 (1.11, 1.96)               | 0.007   | 1.36 (1.02, 1.80)               | 0.03    | 1.37 (0.92, 2.02)               | 0.12    |
|        | Abnormal                                               | 2.40 (1.87, 3.09)               | <0.001  | 1.76 (1.37, 2.27)               | <0.001  | 1.40 (0.99, 1.98)               | 0.06    |
|        | Effect modification (borderline abnormal) <sup>f</sup> | 0.91 (0.63, 1.33)               | 0.64    | 1.08 (0.71, 1.63)               | 0.71    | 0.91 (0.55, 1.49)               | 0.70    |
|        | Effect modification (abnormal) <sup>f</sup>            | 1.15 (0.82, 1.62)               | 0.42    | 0.95 (0.63, 1.42)               | 0.80    | 0.77 (0.48, 1.21)               | 0.26    |

<sup>a</sup> "General" refers to avoiding going to: (i) crowded areas; (ii) social events; and (iii) going out.

<sup>b</sup> "Contact" refers to avoiding contacting individuals who (i) had a fever or respiratory symptoms; and (ii) had been to affected areas (UK) / Wuhan (HK) in the past 14 days (UK) / past one month (HK).

<sup>c</sup> "Work" refers to avoiding going to work.

<sup>d</sup> For perceived severity, "serious" refers to levels 1-2; whereas "not serious" refers to levels 3-5. (Refer to footnote b in Table 1)

<sup>e</sup> The models have been adjusted for all covariates in Table 4.

<sup>f</sup> It measures the "difference of the effect being considered" due to "difference in region", and its value is the ratio of the two region-specific effects.

<sup>g</sup> For perceived ease of transmission, 'ease' refers to that the virus can be transmitted by having face-to-face conversation with someone who has coronavirus but no symptoms; otherwise, the perceived ease of transmission is 'difficult'.



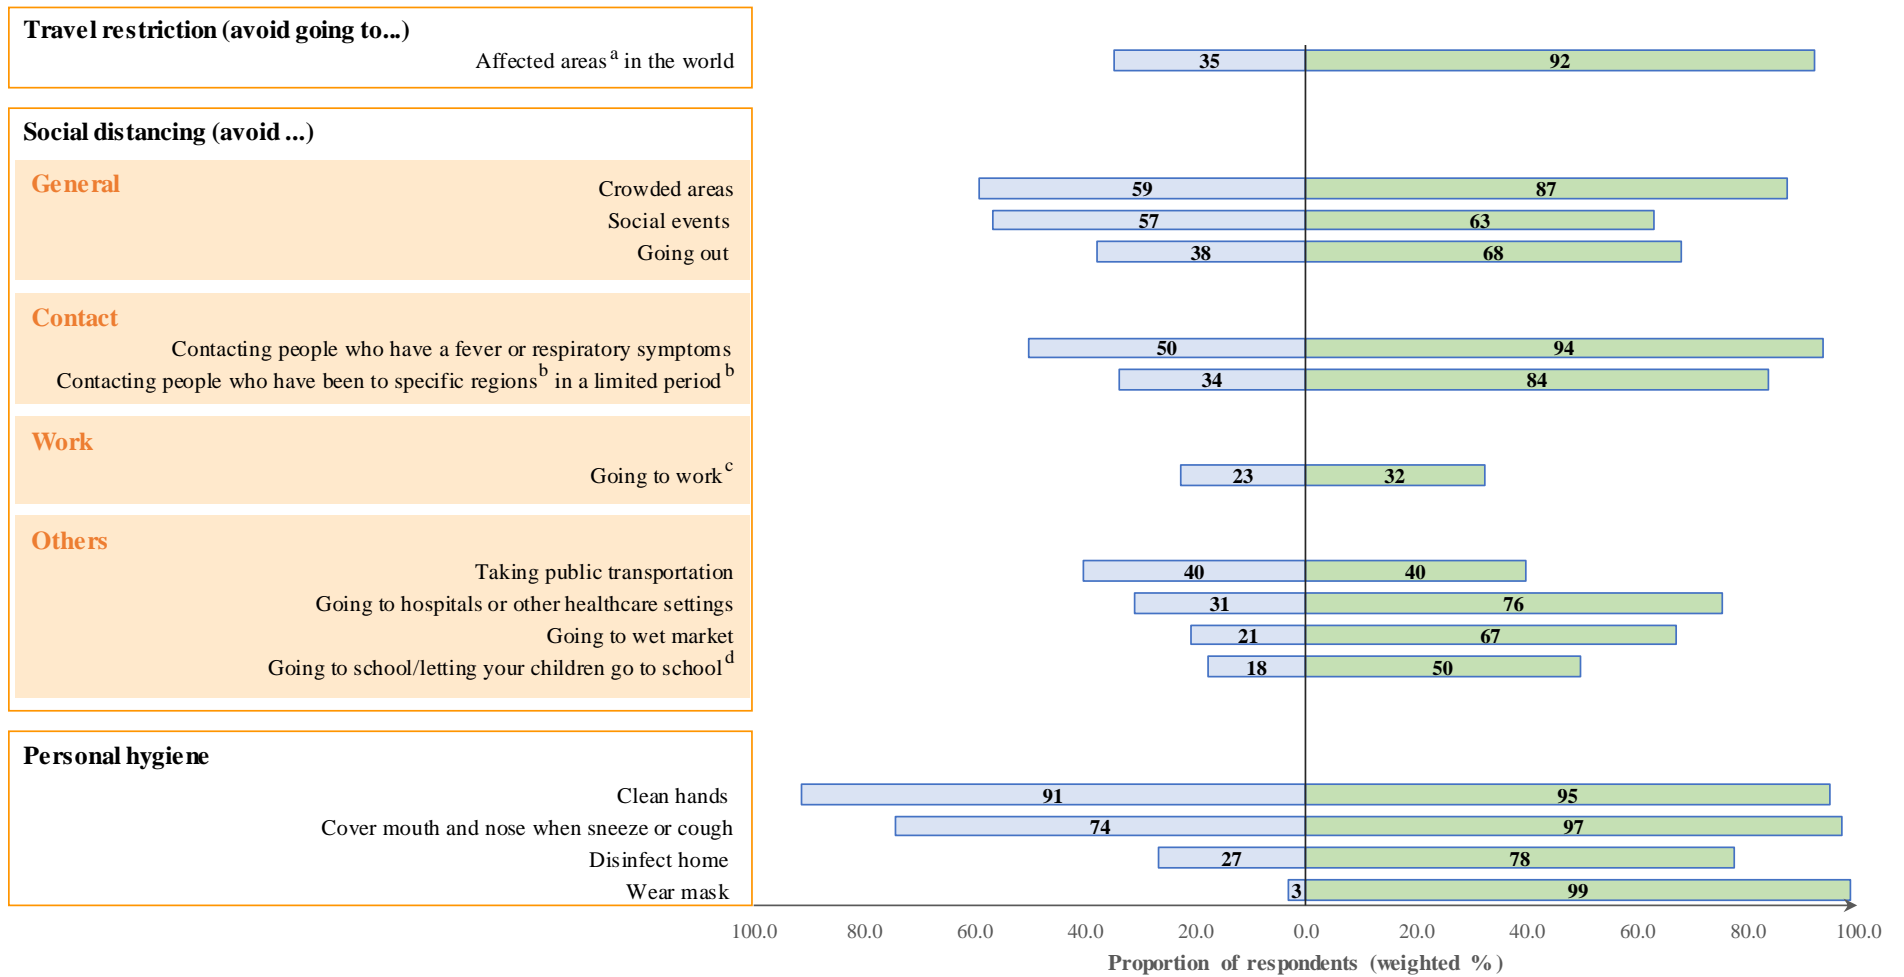

Figure 1. Adoption of precautionary measures against COVID-19

<sup>a</sup> Affected areas refer to China (HK) / affected areas in the world (UK).

<sup>b</sup> 'Specific regions in a limited period' refer to affected areas (UK) / Wuhan (HK) in the past 14 days (UK) / past one month(HK).

<sup>c</sup> Only included respondents who were employees or employers (n = 2160).

<sup>d</sup> Only included respondents who were full-time students or have at least one child (n = 1239).
